# Supplementary material for: Definition of sampling units begets conclusions in ecology: the case of habitats for plant communities
Source: PeerJ journal article supplement (doi:10.7717/peerj.815), 2015-03-05
Supplement: Supplemental_Table_S1.pdf [file Supplemental_Table_S1.pdf]

Table S1. Number of habitats per district and approach and their corresponding bedrock type. We used information obtained from bedrock maps (The Geological survey of Norway; [www.ngu.no](http://www.ngu.no)), assigning each target habitat with the correct bedrock type after the field session.

|                        |             |                          | <b>formal approach</b> | <b>subjective approach</b> |
|------------------------|-------------|--------------------------|------------------------|----------------------------|
| <b>mesic habitat</b>   | <b>east</b> | sandstone                | 3                      | 2                          |
|                        |             | sandstone, schist        | 2                      | 3                          |
|                        |             | sandstone, schist, calc. | 1                      | 1                          |
|                        | <b>west</b> | sandstone                | 3                      | 2                          |
|                        |             | sandstone, schist        | 0                      | 0                          |
|                        |             | sandstone, schist, calc. | 1                      | 2                          |
| <hr/>                  |             |                          |                        |                            |
| <b>snowbed habitat</b> | <b>east</b> | sandstone                | 1                      | 1                          |
|                        |             | sandstone, schist        | 2                      | 2                          |
|                        |             | sandstone, schist, calc. | 0                      | 0                          |
|                        | <b>west</b> | sandstone                | 2                      | 2                          |
|                        |             | sandstone, schist        | 0                      | 1                          |
|                        |             | sandstone, schist, calc. | 2                      | 1                          |
