# Supplementary material for: Definition of sampling units begets conclusions in ecology: the case of habitats for plant communities
Source: PeerJ journal article supplement (doi:10.7717/peerj.815), 2015-03-05
Supplement: Supplemental_Table_S2.pdf [file Supplemental_Table_S2.pdf]

Table S2. Replication of plots according to fixed factors of the mixed models. Mixed models contained the approach of defining sampling units, the two districts of different reindeer density and the three bedrock categories as fixed factors.

|                        |                 |             | formal approach          | subjective approach |    |
|------------------------|-----------------|-------------|--------------------------|---------------------|----|
| <b>mesic habitat</b>   | <b>district</b> | <b>east</b> | sandstone                | 58                  | 34 |
|                        |                 |             | sandstone, schist        | 32                  | 39 |
|                        |                 |             | sandstone, schist, calc. | 25                  | 16 |
|                        | <b>west</b>     |             | sandstone                | 46                  | 33 |
|                        |                 |             | sandstone, schist        | 0                   | 0  |
|                        |                 |             | sandstone, schist, calc. | 16                  | 30 |
| <hr/>                  |                 |             |                          |                     |    |
| <b>snowbed habitat</b> | <b>district</b> | <b>east</b> | sandstone                | 21                  | 20 |
|                        |                 |             | sandstone, schist        | 18                  | 24 |
|                        |                 |             | sandstone, schist, calc  | 0                   | 0  |
|                        | <b>west</b>     |             | sandstone                | 26                  | 27 |
|                        |                 |             | sandstone, schist        | 0                   | 16 |
|                        |                 |             | sandstone, schist, calc. | 20                  | 16 |
